1 **Lessons Learned from Development and Implementation of the National Surgical,**  
2 **Obstetric and Anaesthesia Plan in Ethiopia: a qualitative study**

3  
4 Amanuel Belay<sup>1¶</sup>, Medhanit Getachew<sup>1¶</sup>, Abebe Bekele<sup>2,3</sup>, Andualem Deneke Beyene<sup>2</sup>, Amezene  
5 Tadesse<sup>2</sup>, Justine Davies<sup>4,5,6</sup>, Andrew JM Leather<sup>7</sup>, Charlotte Hanlon<sup>1,8\*</sup>

- 6
- 7 1. Centre for Innovative Drug Development and Therapeutic Trials for Africa, Addis Ababa
  - 8 University, Addis Ababa, Ethiopia
  - 9 2. Department of Surgery, School of Medicine, College of Health Sciences, Addis Ababa
  - 10 University, Ethiopia
  - 11 3. School of Medicine, University of Global Health Equity, Rwanda
  - 12 4. Institute of Applied Health Research, University of Birmingham, Birmingham, UK
  - 13 5. Centre for Global Surgery, Department of Global Health, Stellenbosch University, Cape
  - 14 Town
  - 15 6. Medical Research Council/Wits University Rural Public Health and Health Transitions
  - 16 Research Unit, Faculty of Health Sciences, School of Public Health, University of the
  - 17 Witwatersrand, Johannesburg, South Africa
  - 18 7. King's Centre for Global Health and Health Partnerships, School of Life Course and
  - 19 Population Sciences, King's College London, London, UK
  - 20 8. Centre for Global Mental Health, Health Service and Population Research Department,
  - 21 Institute of Psychiatry, Psychology and Neuroscience, King's College London, UK

22

23 \* **Corresponding author**

24 E-mail: [charlotte.hanlon@kcl.ac.uk](mailto:charlotte.hanlon@kcl.ac.uk)

25 ¶**These authors contributed equally to this work.**

26 **Funding:** The research underpinning the findings presented in this paper was funded by the  
27 National Institute of Health Research (NIHR) Global Health Research Unit on Health System  
28 Strengthening in Sub-Saharan Africa (ASSET), King’s College London (GHRU 16/136/54)  
29 using UK aid from the UK Government.

30 **Competing interests:** None

31 **Data availability:** Open access.

32 **Short title:** National surgical planning and implementation in Ethiopia

33

34 **Author contributions**

35 AL, JD and AB conceptualised the overarching research goals and aims, and contributed to  
36 funding acquisition. AL, JD, AB, AD and CH contributed to developing the methodology. MG  
37 conducted the interviews. AB and MG led data analysis, supervised by CH. AB and MG  
38 prepared the first draft. All authors contributed to interpretation of findings, reviewing and  
39 editing drafts to produce the final manuscript. All authors approved the final submitted version  
40 of the manuscript.

41

42

43 **Abstract**

44 **Background:** The Saving Lives Through Safe Surgery (SaLTS) project was launched in 2016 by  
45 the Ethiopian Ministry of Health to improve access and quality of surgical and anaesthesia care  
46 throughout Ethiopia. A key action of SaLTS was to develop a National Surgical, Obstetric and  
47 Anaesthesia Plan (NSOAP). The aim of this study was to explore barriers and facilitators in the  
48 development and implementation of this plan in Ethiopia.

49 **Methods:** We conducted semi-structured interviews with 12 key stakeholders involved in  
50 developing and implementing the NSOAP at national and regional level in Ethiopia. Thematic  
51 analysis was performed.

52 **Results:** The attention given to safe surgery after the Lancet Commission on Global Surgery that  
53 reported in 2015, provided key impetus to commitment from the Ethiopian government to develop  
54 an NSOAP. Another important opportunity while drafting the plan was the engagement of relevant  
55 and motivated professionals. However, major challenges during development included a lack of  
56 consistent leadership, no prior experience to benchmark from, the extended time taken to complete  
57 the plan, the lack of exclusively dedicated staff, varying engagement, awareness and commitment  
58 of regional bureaus and poor quality of available data to inform the situation analysis. Key  
59 facilitators of implementation were ownership of the plan by the government and involvement of  
60 a multidisciplinary implementation team. However, this was undermined by poor cost estimation  
61 and inadequate commitment of financial resources, the low quality of surgical equipment and  
62 supplies, and the lack of dedicated human resources, data management systems, ongoing  
63 stakeholder engagement, and government accountability. Recommendations to increase the  
64 success of future planning and implementation included the need to properly estimate resources  
65 and financial impact, carry out a careful baseline assessment, implement checklists for monitoring

66 and evaluation, ensure reasonable resource allocation and involve grassroots regional stakeholders  
67 from the beginning. Alongside this, countries need to have committed leadership and transparency  
68 in setting goals to bring about broad stakeholder engagement.

69 **Conclusion:** Ethiopia showed early commitment to strengthen surgical systems and improve  
70 surgical care. Lessons learned can help to guide and encourage other countries to develop realistic  
71 NSOAPs and support their effective implementation on the ground.

72 **Keywords:** *surgical plan, obstetric plan, anaesthesia plan, health policy, surgical care,*  
73 *implementation, Ethiopia*

## 74 **Background**

75 Surgical care and anaesthesia services have been recognized by the World Health Assembly  
76 (Resolution-68/15) as an important public health investment and a key component of universal  
77 health coverage [1]. Nonetheless, it has been estimated that five billion people lack access to safe,  
78 affordable surgical and anaesthesia care when needed. This disparity disproportionately affects  
79 those living in low- and middle-income countries: an estimated 93% of the population in sub-  
80 Saharan Africa does not have access to safe, affordable surgical and anaesthesia care compared to  
81 3.6% of the population in higher-income regions [2]. In Ethiopia, a country with a population of  
82 120 million people, there is an estimated unaddressed need for 5,000,000 surgical procedures per  
83 year [3]. To address this gap, a national plan that specifically addresses surgery is essential to  
84 ensure that surgical and anaesthesia care are fully integrated into the health system and for proper  
85 planning of care delivery, education and research [2]. Developing a national plan is an essential  
86 first step for countries to strengthen their surgical systems and improve surgical care [4].

87 The Saving Lives Through Safe Surgery (SaLTS) initiative was launched in 2016 by the Ethiopian  
88 Ministry of Health to improve access and quality of surgical and anaesthesia care throughout  
89 Ethiopia [3]. Through SaLTS, Ethiopia became one of the first countries to develop a National  
90 Surgical, Obstetric and Anesthesia Plan (NSOAP) and emerged as a leader in sub-Saharan Africa  
91 in prioritizing surgery as part of a national healthcare strategy [5, 6]. The Lancet Commission on  
92 Global Surgery has developed a template for the development of a national surgical plan [2],  
93 covering the following six domains aligned with the WHO health service building blocks:  
94 infrastructure, workforce, service delivery, financing, information management and governance  
95 [7]. At the time of conducting this study, six countries had developed NSOAPs, 10 countries had  
96 plans underway and 23 additional countries had shown a commitment to developing an NSOAP  
97 [6, 8].

98 The existence of such a national-level plan is not, however, enough in itself to ensure improved  
99 access to safe, affordable, surgical and anaesthesia care. Plans need to be implemented and we are  
100 only aware of one country (Ethiopia) that has attempted to implement an NSOAP. Although the  
101 development and early implementation of the Ethiopian NSOAP have been described previously  
102 (5), to the best of our knowledge, there has been no systematic investigation of the barriers and  
103 facilitators to the development and implementation of NSOAPs in this or any other low-resource  
104 setting. The objective of this study was to explore the NSOAP planning process and the barriers  
105 and facilitators to the development and implementation of a national surgical plan in Ethiopia.

## 106 Methods

### 107 Design

108 The study design was qualitative, nested within the surgical work package of the ASSET (HeAlth  
109 System StrEngThening in sub-Saharan Africa) National Institute of Health Research Global Health  
110 Unit [9], a health system strengthening research program working across four sub-Saharan African  
111 countries (Ethiopia, Sierra Leone, South Africa, Zimbabwe) and three platforms of care (surgery,  
112 primary care and maternal care).

### 113 Context

114 The study was carried out in Ethiopia from 27<sup>th</sup> May 2018 until 23<sup>rd</sup> January 2020. The SaLTS  
115 initiative proposed to use a health system approach to improving surgical care through the  
116 Ethiopian Hospitals Alliance for Quality (EHAQ) platform to simultaneously tackle activities  
117 across eight ‘pillars of excellence’. These key strategic pillars are 1) Leadership, management, and  
118 governance: a nationally scaled surgical leadership and mentorship program, 2) Infrastructure:  
119 operating room construction and oxygen delivery plan, 3) Supplies and logistics: a national  
120 essential surgical procedure and equipment list, 4) Human resource development: a Surgical  
121 Workforce Expansion Plan and Anaesthesia National Roadmap, 5) Advocacy and partnership:  
122 strong Ministry of Health partnerships with international organizations, including General Electric  
123 Foundation’s safe Surgery 2020 initiative, 6) Innovation: facility-driven identification of problems  
124 and solutions, 7) Quality of surgical and anaesthesia care service delivery: a national peri-operative  
125 guideline and WHO Surgical Safety Checklist implementation, and 8) Monitoring and evaluation:  
126 a comprehensive plan for short-term and long-term assessment of surgical quality and capacity  
127 [3].

## 128 **Participants**

129 Informants were purposively selected based on being key stakeholders involved at the national or  
130 regional level of plan development and implementation. They included policy-makers, planners,  
131 surgeons in leadership positions, individuals with a variety of responsibilities at NGOs and  
132 government level consultants.

## 133 **Data collection**

134 A topic guide was developed for in-depth interviews based upon the authors' knowledge of the  
135 field and the literature. The interview guide was developed to explore the following topics: the  
136 process of developing the plan, main steps taken during the drafting of the plan, opportunities and  
137 barriers during the development process, key players in the development process, opportunities  
138 and barriers during the implementation of the plan and lessons learned/recommendations for future  
139 planning.

140 The topic guide was first developed in English and translated into Amharic. One experienced  
141 interviewer, fluent in Amharic did all the interviews in Amharic. Interviews were audio-recorded.  
142 Eleven interviews took place in the respondents' office and one was done virtually via the zoom  
143 platform.

## 144 **Analysis**

145 All interviews were transcribed in Amharic, translated into English, and uploaded to OpenCode  
146 4.02 software to facilitate analysis. Thematic analysis was performed. Two members of the  
147 research team (AB, MG) read and re-read transcripts to familiarize themselves with the data and  
148 independently carried out line-by-line coding of two randomly selected transcripts. AB and MG

149 met twice to compare and refine codes and coding. They developed a common codebook through  
150 a discussion of each code definition and assignment. CH reviewed the codebook with AB and MG  
151 to identify areas of overlap, inconsistency or possible gaps. AB and MG then independently coded  
152 the remaining transcripts based on the codebook. Similar codes were grouped to form themes, and  
153 these were compared back to the data and iteratively improved until consensus was reached.  
154 Quotes from a range of participants were selected to illustrate these themes.

### 155 Ethical approval

156 Ethical clearance was obtained from the Institutional Review Board (IRB) of the College of Health  
157 Sciences of Addis Ababa University (protocol number 026/18/PSY) and King's College London  
158 (protocol number HR-17/18-6144). Written informed consent was obtained from each participant.  
159 Confidentiality was ensured by anonymising identifying information and assigning a unique ID  
160 code to all interviews.

### 161 Results

162 Twelve respondents participated, including respondents from the Ministry of Health, a Regional  
163 Health Bureau and implementing NGOs. See Table 1 for characteristics. Ten participants were  
164 trained as medical doctors, one was a nurse and one had a public health background.

165 **Table 1. Socio-demographic characteristics of participants**

166

| Code | Position | Involvement in the Saving Lives Through Safe Surgery (SaLTS) initiative |
|------|----------|-------------------------------------------------------------------------|
|------|----------|-------------------------------------------------------------------------|



|       |                          |                                    |
|-------|--------------------------|------------------------------------|
| ID 01 | Ministry of Health       | Planning/design and implementation |
| ID 02 | Ministry of Health       | Planning/design only               |
| ID 03 | Implementing NGO         | Planning/design and implementation |
| ID 04 | Implementing NGO         | Planning/design                    |
| ID 05 | Implementing NGO         | Late stage of the planning/design  |
| ID 06 | Surgical clinical expert | Planning/design                    |
| ID 07 | Regional Health Bureau   | Piloting stage                     |
| ID 08 | Surgical clinical expert | Planning/design and implementation |
| ID 09 | Surgical clinical expert | Piloting stage                     |
| ID 10 | Surgical clinical expert | Piloting                           |
| ID 11 | Ministry of Health       | Planning/design and implementation |

|       |                          |                                    |
|-------|--------------------------|------------------------------------|
| ID 12 | Surgical clinical expert | Planning/design and implementation |
|-------|--------------------------|------------------------------------|

167

168 **Key steps in drafting and developing the NSOAP**

169 Safe surgery as a problem area needing a response started to be given attention in Ethiopia  
170 following the publication of the Lancet Commission on Global Surgery in 2015 (Fig 1). The  
171 adoption of emergency and essential surgical care and anaesthesia as a component of universal  
172 health coverage at the May 2015 World Health Assembly (WHA) was also perceived by  
173 respondents as providing important impetus for the Ethiopian Ministry of Health (MoH) to  
174 prioritize surgical care and initiate development of the NSOAP.

175 **Figure 1. Key steps in the development of the Ethiopian NSOAP**

176 The next key step was the MoH engaging with various professional institutions and stakeholders.  
177 The idea for SaLTS was presented to senior surgeons, anaesthetists and obstetricians in Ethiopia.  
178 Under the medical services directorate of MoH, a team of professionals was formed to provide  
179 technical support and develop a concept note for SaLTS. The team members were identified  
180 through the Ethiopian Medical Association and Addis Ababa University. To prioritize surgical  
181 interventions that are cost-effective for scaling up, an “Ethiopian essential service package for  
182 surgery” was developed. During the development process of this package, in addition to using the  
183 documents prepared by World Bank and WHO as a baseline, input was obtained from a multi-  
184 professional team drawn from multiple different surgical disciplines (including Ear, Nose and  
185 Throat, and dental).

186           “... engagement was a critical part but during the engagement process, it was necessary  
187           to engage the responsible professionals. Therefore, senior professionals have engaged not  
188           only once but also repeatedly ... and the other thing we shouldn't have to underestimate  
189           is, technical support, which is a very important thing. There were a team of professionals  
190           that came from different areas who were dedicated to support and advise the ministry of  
191           health.” (ID 03)

192           Another important step in developing the surgical plan was reported to be the time taken to conduct  
193           a situational analysis. After a concept note was developed for funding, the situation analysis was  
194           carried out. The situation analysis focused on the current status of infrastructure, human resources,  
195           equipment in different settings and surgical and anaesthesia services that were being provided  
196           across Ethiopia. The data from this situation analysis was used to identify gaps and helped the  
197           team to develop the eight pillars for the Plan.

198           “..... to some extent situational analysis was attempted. This situational analysis, when it  
199           is done, the pillars, for instance, on HR [human resources], how many surgeons are there,  
200           how many obstetricians do we have, how many ophthalmologists do we have, where are  
201           they and the like, these kinds of exercise was done on the analysis. Then, starting from the  
202           situational analysis, after we identify gaps, those eight pillars were made to stand out.”  
203           (ID 01)

204           The planning and implementation of some pillars of the NSOAP were described as being  
205           undertaken in parallel. Along with the planning process, anaesthesia, Intensive Care Unit and  
206           Operating Room equipment that was needed for implementation was purchased. In addition,  
207           residency programmes for training of anaesthetists, surgeons, obstetricians and ophthalmologists

208 were expanded to strengthen the available workforce. Respondents emphasized the importance of  
209 piloting aspects of the plan. As part of the implementation, a program on human capacity building,  
210 which aimed to strengthen leadership and innovation for surgical and anaesthesia care was piloted  
211 in five hospitals located in two regions. The experience from this pilot study was then incorporated  
212 into the national plan (SaLTS).

213 *“... For learning purposes, as the two regions were ready at the time, we conducted pilot*  
214 *studies in five hospitals in Amhara and Tigray regions. Then we took the experience we*  
215 *found and we have tried to incorporate it as input in the SaLTS document.” (ID 08)*

216

217

## 218 Challenges and opportunities in developing the NSOAP

219 Many of the respondents spoke of the opportunity that arose due to the global attention given to  
220 safe surgery and the resulting recognition of surgery as an essential component of care in Ethiopia.

221 *“The Lancet Commission publication is a landmark publication on the role of surgery as*  
222 *an essential [part of] universal care. After that, they [Ministry of Health officials] believed*  
223 *that there is a need to have one strategic document for Ethiopia too. So, the minister who*  
224 *was there at that time believed in that and started the initiative and developed the plan*  
225 *together with the experts...” (ID 05)*

226 The resulting commitments from champions for surgical care in the MoH and the funding made  
227 available by various partners were mentioned as important opportunities. The strong engagement

228 of stakeholders, especially professionals and professional societies, (e.g. the Surgical Society of  
229 Ethiopia) was also seen as vital to drive the process forwards.

230 An important challenge was that this was the first time an NSOAP had been developed in a low-  
231 income country. There was no prior experience or benchmark, so this made the process difficult.

232 *“...at that time, when we did this, no other country had developed their surgical plan so,  
233 this was I can see the first so, when you are the first, again the problem is there is no one  
234 you can benchmark or refer to, there was no one we could do that with, so it was not easy  
235 ...” (ID 01)*

236 Respondents noted that a lack of consistent leadership and management of the process of  
237 developing and implementing the plan was one of the main challenges. As the development  
238 process went on, the policymakers were perceived not to have the required understanding and  
239 commitment to lead. It was also noted that the leadership did not allow active participation of all  
240 key stakeholders or engagement was late, when decisions had already been made. Inconsistent  
241 leadership was described by respondents, exacerbated by a high turnover of leadership within the  
242 MoH. Friction about who should lead was also present.

243 *“First, the leadership at the ministry of health was good in principle. But there was a  
244 turnover of the leadership team. There was inability to make priorities most of the times.  
245 There was sometimes no strong tendency from the Ministry of Health side to bring all  
246 together and communicate in a clear manner and take things forward. So, from the ministry  
247 of health side, a deficiency was observed.” (ID 08)*

248 Not including a budget allocation plan due to the uncertainties of how much it would cost was  
249 mentioned as the main limitation of the plan.

250 *“But I think the main limitation of the plan was, budget allocation was not done...the*  
251 *budget allocation was not seen on the plan. But the plan has a big impact on the budget...I*  
252 *think it is because if the budget is predetermined it might be very high or it might be very*  
253 *low ...I think that is why the budget is not calculated. We have tried to draft the budget on*  
254 *another document but if you see the document now, you may not find the exact amount of*  
255 *money.” (ID 06)*

256 The lengthy time for the planning process was emphasized by respondents as the other main  
257 challenge. In total, the planning process took about nine months. No staff members were  
258 exclusively dedicated to the task; rather the team had to drop other activities, like delivery of  
259 surgical care, to engage in the planning process. There were competing priorities of the surgeons  
260 that did not allow them to provide timely review and feedback to inform the planning process.

261 *“The other challenge I would think is you would have competitive priority and like the*  
262 *team does not do this full time, many of them are physicians, they have to go to their clinic,*  
263 *they have to go to their patients ...” (SALT 10)*

264 *“It is as I told you, as the individual didn’t engage, it might not be timely reviewed and*  
265 *things might not go by the pace you thought, and there were competing priorities. Due to*  
266 *these reasons, it was late for a certain time.” (SALT 04)*

267 Furthermore, limited data availability and poor quality of the available baseline data was a barrier  
268 to progress. Basic information on essential service packages and the number of practitioners in the  
269 country were not readily accessible.

270 *“It is difficult to get quality data in our country. We don’t even know the burden of surgical*  
271 *disease; it is not easy to know the number of practitioners in each field. If you want to*  
272 *know how many anaesthetists are actively practising in Ethiopia, you wouldn’t find the*  
273 *number. So, it is difficult to find such type of background data...it is difficult to find quality*  
274 *data. Thus, if you are thinking to develop the plan based on that data, it will be difficult.”*  
275 *(ID 05)*

276 Lack of reporting from the devolved regional health administrations, reflecting both a lack of  
277 awareness and involvement, was one of the reasons identified for limited data sources. The variable  
278 understanding, commitment and willingness of regional health bureaus to invest in and lead the  
279 implementation of the plan was perceived to be an important barrier.

280

## 281 Implementation Challenges and facilitators (current and foreseen)

282 Although respondents had some criticisms of the MoH leadership team during the development of  
283 the plan, the leadership at all levels and ownership of the program by the government (MoH) was  
284 seen as vital for actually getting the plan implemented.

285 *“... At its inception, it was Dr Kesete’s (the minister at the time) idea, not anyone else’s. If*  
286 *we give credit, it should be for him. He identified the funding and he had the idea that the*  
287 *focus area should be on surgery and the country should focus on that. He was consulting*

288 *others about this idea... We have repeatedly discussed how we should design the project.*  
289 *Then his project was written by engaging others in the ministry and surgeons outside the*  
290 *ministry, then when a partnership was started with GE Foundation, Jhpiego was involved*  
291 *and then Harvard was engaged, it meant that these all were actively engaged.” (ID 12)*

292 Another important facilitator was bringing together professionals from relevant professional  
293 associations. The involvement of a multidisciplinary implementation team of surgeons from the  
294 Ethiopian Surgical Society, partner NGOs and other professionals (especially anaesthetists) was  
295 seen as a strength.

296 Respondents also mentioned monitoring and evaluation, presentation of findings to higher officials  
297 and stakeholders, follow up, accountability, decentralization of the work to regional health offices,  
298 better resources and infrastructure and detailed planning as important implementation facilitators.

299 Nonetheless, the success of implementation was greatly affected by limitations in financial  
300 resources and surgical supplies. Problems with the systems for purchasing and maintenance of  
301 equipment and supplies, as well as low quality of the procured materials, held back  
302 implementation.

303 *“Supply issues, the sustainability of consumable supplies, anaesthesia and other surgical*  
304 *equipment’s whether it is consumable or non-consumable, when we think of the sustained*  
305 *availability of these supplies, not only in our country but also worldwide, some of the*  
306 *supplies are not accessible, they are not affordable as well.” (ID 11)*

307 Respondents said that the cost estimation exercise was not sufficiently thorough or accurate which  
308 had consequences for the execution of the plan. In addition, different implementation activities



309 were funded by different donors but the fund was only available for a few selected hospitals,  
310 making the broader execution of the plan nationwide unfeasible.

311 As with the development process, changes in the MoH leadership, the lack of a dedicated lead  
312 person, limited resources and high turnover rates of professionals at the implementation sites  
313 undermined implementation efforts.

314 *“What challenged the programme was the leadership change at the Ministry of Health. A*  
315 *project which used to be seen greatly, a project which reports used to be requested weekly*  
316 *by the ministry, which was a regular meeting agenda, a project raised by the minister*  
317 *whenever he travels abroad, it all went down to a cliff as soon as a new minister is*  
318 *appointed,” (ID 12)*

319

320 In addition, the prominent involvement of NGOs at the implementation stage made the health  
321 professionals consider SaLTS as additional work as opposed to part of the routine work.

322 *“... the idea of “donor’s job” is usually “NGO’s job” and that will be a barrier. Thus, as*  
323 *much as possible we need to take that out of our minds. We need to convince them as this*  
324 *is the ministry’s job and as it is part of our routine work. Otherwise, it is going to be a*  
325 *barrier. When you are going to do some tasks, if it is NGO’s job, people have a different*  
326 *attitude towards that and they might ask for additional payment. So, such kinds of things*  
327 *might happen more than you realize. Because, they may say like, “this is NGO’s job and it*  
328 *is not clear to understand” ... such type of feelings might be a barrier.” (ID 05)*

329 Respondents mentioned that the political instability in the country that began just before  
330 implementation started was also a huge challenge.

331 *“... right at our entry point, the country went into chaos. Those people that we trained on*  
332 *SaLTS, they back out, that means they have resigned in regions that means, things that*  
333 *were there, all people and those who took the orientation and training, those who took the*  
334 *skill, the people who took it, overall, given the situation that was there in the country, the*  
335 *economy inflation and the situation in the country, they resigned, so, when you go and ask*  
336 *them what SaLTS is they talk to you about the salt we put in foods, not this Safe lives*  
337 *through safe surgery.” (ID 02)*

338 The lack of a data management system, ongoing stakeholder engagement and government  
339 accountability were also raised as challenges to implementation. A few participants stated that the  
340 programme did not consider how surgery fits with other priority programs or the affordability for  
341 the community.

342

### 343 **Lessons learned in developing and implementing an NSOAP**

344 There were several recommendations by respondents for other countries that intend to develop and  
345 implement national surgical plans. Framing safe surgery as a public health problem and ensuring  
346 committed leadership at all levels were the key points mentioned by respondents. It was said that  
347 professionals in the sector should stay motivated and give national planning and implementation  
348 high priority. To maintain motivation, the MoH or other stakeholders that own the process in the  
349 country should decentralize the work to the grassroots level and encourage leadership at all levels.

350           *“The first thing is to make either the political leaders or technical leaders own the*  
351           *program. It is important to make them take that as their own job. If we can do this, the*  
352           *leadership at each level will have a responsibility and accountability...and they will*  
353           *allocate resources for the program and they will also evaluate whether the resource is*  
354           *being used properly or not. Therefore, it is important to do this starting from the federal*  
355           *level to the woreda level.” (ID 06)*

356    Transparency in setting the national goals and commitment by the governing body would allow  
357    the stakeholders at different levels to have similar understandings and strengthen their  
358    commitment.

359           *“The major thing is to have a clear plan. There has to be a clear plan, the plan should*  
360           *clearly state the implementation process and responsibilities. And there needs to be*  
361           *monitoring and evaluation to follow evaluate the performance of the implementation. But*  
362           *there need to be standards to be followed while doing this.” (ID 11)*

363    Another important recommendation was the need for a community baseline assessment to develop  
364    a contextualized plan. Such an assessment should include situation analyses of resources and  
365    financial impacts of surgical conditions to make the case for the return on investment for making  
366    surgical care available.

367           *“It is good to conduct a situational analysis in the whole country. It is important to know*  
368           *how many hospitals are available, the level of those hospitals, how many health centres*  
369           *there are, after that it is also necessary to assess the availability of the human resource.*  
370           *They need to think about the availability of human resources that can implement the*  
371           *program.” (ID 06)*

372 Furthermore, it was recommended that the planning process should be done step by step, ensuring  
373 that all required tasks are completed promptly. This will allow partners to take part in steps that  
374 require their input. This will additionally allow the process to be comprehensive, for instance,  
375 considering all types of surgery, and other tasks needed when planning. Finally having checklists  
376 and standards for monitoring and evaluation of the plan and setting ethical standards were  
377 highlighted as key points to consider when drafting such a plan.

378 Changes that the respondents suggested in the planning and design process included engagement  
379 of stakeholders at all levels (mainly regional bureau staff) from the beginning to the end. This  
380 engagement should be done in the form of teamwork, where both leaders and team members are  
381 equally informed and committed. The rationale for this approach was that it would maintain  
382 commitment despite a change in the leadership. One respondent suggested that the development  
383 of an activity-based strategic plan before a national surgical plan would have given better direction  
384 to implementation activities.

385 *“The first thing is the leadership commitment has main role. We have to make commitment*  
386 *at Ministry of Health and regional level by all aspects and engage professional societies*  
387 *since they are the one which implement it. So, their engagement have main role .“ (ID 04)*

388 It was suggested that the pillars of SaLTS should be refined using local experience; for example,  
389 to add one pillar on social mobilization and to prioritize fewer pillars to give more focus on details.  
390 Developing the plan at the country’s regional level and consolidating centrally at a later stage was  
391 also recommended as an alternative approach to top-down planning and implementation. Regional  
392 planning would need to be supported by adequate budget, facilitation and human resources.

393            *“I believe that it is also necessary to work on social mobilization and it might be necessary*  
394            *to add one pillar which can address the social mobilization part. Because it is important*  
395            *to take SALT program from the health professionals and ministry of health and give the*  
396            *ownership to the community.” (ID 06)*

## 397 Discussion

398 This paper explored the processes, facilitators and barriers of development and implementation of  
399 an NSOAP in Ethiopia.

400 The NSOAP was the first of its kind to be developed and implemented in Ethiopia. A major  
401 opportunity that supported the development and implementation process was the recognition given  
402 to safe surgery and anaesthesia globally, which gave impetus to national recognition of this  
403 neglected area of healthcare. The involvement of Ethiopian global surgery experts in the global  
404 surgical movement is likely to have facilitated this translation from global to national relevance.  
405 There are increasing calls for global health initiatives to be led from the global south [10]. Strong  
406 LMIC leadership is likely to increase buy-in by national governments while ensuring contextual  
407 relevance and alignment with priorities.

408 Key identified challenges resulted from the lack of consistent leadership at the highest level, full  
409 commitment from stakeholders and the availability of limited resources. The high-level political  
410 commitment by the Ministry of Health was the first key step in the development of the NSOAP.  
411 Strong ownership by the government and the involvement of expert working groups that included  
412 key individuals and organizations involved in surgery and anaesthesia was the next important step  
413 in the development of the plan. The Ethiopian Ministry of Health has a strong track record of  
414 exercising country ownership of health development [11]. Thus, MoH tends to coordinate

415 resources from partners and donors so that they are directed towards the priorities of the country  
416 and avoid fragmentation from vertical planning or undue influence of external agendas. Closely  
417 related to the question of political commitment is the imperative of ensuring strong and continuous  
418 leadership which, our findings indicate was one of the main challenges in both the development  
419 and the implementation of this national plan. Inconsistent or inadequate leadership has been  
420 identified as a barrier to implementation of national plans for non-surgical initiatives in other  
421 LMICs as well [12]. Even though there was a strong initial engagement of stakeholders in  
422 developing the NSOAP, there was a lack of sustained engagement in the implementation of the  
423 plan. Systematically identifying and involving relevant stakeholders in developing such a plan and  
424 continued engagement of all stakeholders at implementation is necessary [13].

425 A major implementation challenge for the Ethiopia national surgical plan was the inadequacy of  
426 available funding. Limited financial resources are a key challenge in implementing health plans in  
427 other countries [14, 15]. Not having a budget allocation plan for such a country-wide programme  
428 undermines implementation efforts, even when significant financial support is available from  
429 partners. Lessons learned from the description of developing and planning to implement the  
430 national surgical plan in Tanzania showed that the funding available was sufficient but required  
431 dedicated staff to properly manage the programme and allocate funds for the planned activities  
432 [16]. This lack of dedicated staff was similarly pointed out as a challenge in our study. Findings  
433 from early implementation of the Ethiopia NSOAP had shown that attracting additional financial  
434 resources was a challenge [5]. The importance of ensuring sustainable funding for such programs  
435 is also backed by the literature [17]. A vital strategy to guaranteeing a budget line for NSOAP  
436 implementation is integration of an NSOAP into a country's national health strategy and  
437 involvement of the Ministry of Finance from the earliest stages of NSOAP development [4, 18].

438 Identifying and utilization of domestic funding to be supplemented with funding from international  
439 partners is also important [4, 18-20]. Studies show that essential surgical procedures are among  
440 the most cost-effective of all health interventions and that investment in surgical services in LMICs  
441 is affordable [2, 21]. Without scale-up of surgical care, surgical conditions are estimated to result  
442 in losses of up to 2.5% potential annual GDP in LMICs by 2030 [22], making the investment in  
443 surgical care compelling from an economic point of view alone.

444 The designing of the Ethiopian NSOAP could have been more effective if it was based on more  
445 detailed and better-quality data, as well as more diverse data sources. A baseline situational  
446 assessment could also add value to the quality of the plan and inform implementation indicators  
447 and targets [4, 7]. Data points for constructing these indicators and the situation should be  
448 established from regular collection and reporting of standard metrics [23]. A strong monitoring  
449 and evaluation plan is essential for successful NSOAP implementation [24]. Poor and limited data  
450 along with inadequate data management infrastructure and capacity were highlighted by our  
451 respondents. This was also mentioned in the literature as a key barrier to effective monitoring and  
452 evaluation [25, 26].

453 A limitation of this study is that the only source of our findings were individuals who participated  
454 in the planning, designing and piloting of the surgical plan from the ministry of health and NGOs.  
455 Individuals working at the regional level and health facilities did not participate in the study and  
456 so we may have missed important insights on the implementation of SaLTs. Furthermore, the  
457 voices of patients and advocacy groups were not included. It is important for future researchers to  
458 ensure that the experiences and priorities of more diverse stakeholders are explored.

459 In conclusion, country-led planning and the involvement of motivated professionals has been  
460 critical for strengthening the surgical and anaesthesia systems and improving surgical care in  
461 Ethiopia. Lessons learned from the experience of developing and implementing a surgical plan in  
462 Ethiopia can improve ongoing implementation, while also providing important insights to guide  
463 other countries to achieve realistic and effective surgical system change.

464

#### 465 **Acknowledgments**

466 The research underpinning the findings presented in this paper was funded by the National  
467 Institute for Health and Care Research (NIHR) Global Health Research Unit on Health System  
468 Strengthening in Sub-Saharan Africa (ASSET), King's College London (GHRU 16/136/54)  
469 using UK aid from the UK Government. Charlotte Hanlon (CH) receives support through an  
470 NIHR RIGHT grant (NIHR200842) and an NIHR global health research group on homelessness  
471 and mental health in Africa (HOPE; NIHR134325). The views expressed in this publication are  
472 those of the authors and not necessarily those of the NHS, the National Institute for Health and  
473 Care Research or the Department of Health and Social Care, England. CH is also funded by the  
474 Wellcome Trust through grants 222154/Z20/Z (SCOPE) and 223615/Z/21/Z (PROMISE).

475 For the purposes of open access, the author has applied a Creative Commons Attribution (CC  
476 BY) licence to any Accepted Author Manuscript version arising from this submission.

477

478 Conflicts of interest: none



479   **References**

- 480    1.     Price R, Makasa E, Hollands M. World Health Assembly Resolution WHA68.  
481    15:“strengthening emergency and essential surgical care and anesthesia as a component of  
482    universal health coverage”—addressing the public health gaps arising from lack of safe,  
483    affordable and accessible surgical and anesthetic services. *World journal of surgery*.  
484    2015;39(9):2115-25.
- 485    2.     Meara JG, Leather AJ, Hagander L, Alkire BC, Alonso N, Ameh EA, et al. Global Surgery  
486    2030: evidence and solutions for achieving health, welfare, and economic development. *The*  
487    *Lancet*. 2015;386(9993):569-624. doi: <https://doi.org/10.1101/2021.01.06.20248468>
- 488    3.     FMOH. Federal Ministry of Health of Ethiopia National Safe Surgery Strategic PLAN,  
489    Saving Lives Through Safe Surgery (SaLTS) Strategic Plan 2016–2020. Addis Ababa: Federal  
490    Ministry of Health of Ethiopia, 2017.
- 491    4.     Peters AW, Roa L, Rwamasirabo E, Ameh E, Ulisubisya MM, Samad L, et al. National  
492    Surgical, Obstetric, and Anesthesia Plans Supporting the Vision of Universal Health Coverage.  
493    *Global Health: Science and Practice*. 2020;8(1):1-9.
- 494    5.     Bursaa D, Teshome A, Iverson K, Ahearn O, Ashengo T, Barash D, et al. Safe surgery for  
495    all: early lessons from implementing a national government-driven surgical plan in Ethiopia.  
496    *World journal of surgery*. 2017;41(12):3038-45.
- 497    6.     Sonderman KA, Citron I, Meara JG. National surgical, obstetric, and anesthesia planning  
498    in the context of global surgery: the way forward. *Jama Surgery*. 2018;153(10):959-60.
- 499    7.     Albutt K, Sonderman K, Citron I, Nthele M, Bekele A, Makasa E, et al. Healthcare Leaders  
500    Develop Strategies for Expanding National Surgical, Obstetric, and Anaesthesia Plans in WHO

- 501 AFRO and EMRO Regions. *World J Surg.* 2019;43(2):360-7. Epub 2018/10/10. doi:  
502 10.1007/s00268-018-4819-z. PubMed PMID: 30298283.
- 503 8. Truché P, Shoman H, Reddy CL, Jumbam DT, Ashby J, Mazhiqi A, et al. Globalization of  
504 national surgical, obstetric and anesthesia plans: the critical link between health policy and  
505 action in global surgery. *Globalization and Health.* 2020;16(1):1-8.
- 506 9. Seward N, Hanlon C, Abdulahi A, Abrams Z, Alem A, Araya R, et al. HeAlth System  
507 StrEngThening in four sub\_Saharan African countries (ASSET) to achieve high-quality, evidence-  
508 informed surgical, maternal and newborn, and primary care: protocol for pre-implementation  
509 phase studies. *medRxiv.* 2021.
- 510 10. Dalglish SL. COVID-19 gives the lie to global health expertise. *Lancet (London, England).*  
511 2020;395(10231):1189. Epub 2020/03/31. doi: 10.1016/s0140-6736(20)30739-x. PubMed  
512 PMID: 32222159; PubMed Central PMCID: PMC7194526.
- 513 11. Teshome SB, Hoebink P. Aid, ownership, and coordination in the health sector in  
514 Ethiopia. *Development Studies Research.* 2018;5(sup1):S40-S55. doi:  
515 10.1080/21665095.2018.1543549.
- 516 12. Khan F, Owolabi MO, Amatya B, Hamzat TK, Ogunniyi A, Oshinowo H, et al. Challenges  
517 and barriers for implementation of the World Health Organization Global Disability Action Plan  
518 in low- and middle- income countries. *Journal of rehabilitation medicine.* 2018;50(4):367-76.  
519 Epub 2017/10/06. doi: 10.2340/16501977-2276. PubMed PMID: 28980008.
- 520 13. Mukhopadhyay S, Lin Y, Mwaba P, Kachimba J, Makasa E, Lishimpi K, et al. Implementing  
521 World Health Assembly Resolution 68.15: National surgical, obstetric, and anesthesia strategic

- 522 plan development--the Zambian experience. Bulletin of the American College of Surgeons.  
523 2017;102(6):28-35. Epub 2017/09/09. PubMed PMID: 28885807.
- 524 14. Todd G, Mamdani M. Tanzania and the sustainable development goals: has Tanzania  
525 prepared to roll-out and domesticate the health SDGs. Ifakara health Institute. 2017.
- 526 15. Michelo C, Jacobs CN, Munakampe MN, Silumbwe A. Assessing Zambia's Preparedness  
527 to implement sustainable development goals on Health. Zambia: African Center for Global  
528 Health and Social Transformation. 2017.
- 529 16. Citron I, Jumbam D, Dahm J, Mukhopadhyay S, Nyberger K, Iverson K, et al. Towards  
530 equitable surgical systems: development and outcomes of a national surgical, obstetric and  
531 anaesthesia plan in Tanzania. BMJ global health. 2019;4(2):e001282. Epub 2019/05/30. doi:  
532 10.1136/bmjgh-2018-001282. PubMed PMID: 31139445; PubMed Central PMCID:  
533 PMCPMC6509614.
- 534 17. Mghamba JM, Talisuna AO, Suryantoro L, Saguti GE, Muita M, Bakari M, et al.  
535 Developing a multisectoral National Action Plan for Health Security (NAPHS) to implement the  
536 International Health Regulations (IHR 2005) in Tanzania. BMJ global health. 2018;3(2):e000600.  
537 Epub 2018/04/03. doi: 10.1136/bmjgh-2017-000600. PubMed PMID: 29607098; PubMed  
538 Central PMCID: PMCPMC5873533.
- 539 18. Albutt K, Citron I, Sonderman K, Nthele M, Bekele A, Maongezi S, et al. National Surgical  
540 Obstetric and Anaesthesia Planning: Process and Consensus Recommendations. Dubai, United  
541 Arab Emirates: 2018.
- 542 19. Lumumba-Kasongo T, Newman J. 2015 Addis Ababa Action Agenda of the Third  
543 International Conference on Financing for Development "Concerning gender inequality, which

544 is the most important component of social inequality in African states, the international  
545 institutions are the most conservative par excellence.”. Wagadu. 2015;13.

546 20. Yamey G, Shretta R, Binka FN. The 2030 sustainable development goal for health. British  
547 Medical Journal Publishing Group; 2014.

548 21. Mock CN, Donkor P, Gawande A, Jamison DT, Kruk ME, Debas HT. Essential surgery: key  
549 messages from Disease Control Priorities, 3rd edition. Lancet (London, England).  
550 2015;385(9983):2209-19. Epub 2015/02/11. doi: 10.1016/s0140-6736(15)60091-5. PubMed  
551 PMID: 25662414; PubMed Central PMCID: PMCPMC7004823.

552 22. Alkire BC, Shrimel MG, Dare AJ, Vincent JR, Meara JG. Global economic consequences of  
553 selected surgical diseases: a modelling study. The Lancet Global health. 2015;3 Suppl 2(Suppl  
554 2):S21-7. Epub 2015/05/01. doi: 10.1016/s2214-109x(15)70088-4. PubMed PMID: 25926317;  
555 PubMed Central PMCID: PMCPMC4884437.

556 23. Davies JI, Gelb AW, Gore-Booth J, Martin J, Mellin-Olsen J, Åkerman C, et al. Global  
557 surgery, obstetric, and anaesthesia indicator definitions and reporting: An Utstein consensus  
558 report. PLoS medicine. 2021;18(8):e1003749. Epub 2021/08/21. doi:  
559 10.1371/journal.pmed.1003749. PubMed PMID: 34415914; PubMed Central PMCID:  
560 PMCPMC8415575 following competing interests: Tore Laerdal is Executive Director of the  
561 Laerdal Foundation, which provided financial support for the meeting. Tore provided practical  
562 support for the meeting and read and approved the manuscript, but did not input into the  
563 consensus process or conclusions.

564 24. Sonderman KA, Citron I, Mukhopadhyay S, Albutt K, Taylor K, Jumbam D, et al.  
565 Framework for developing a national surgical, obstetric and anaesthesia plan. BJS open.

566 2019;3(5):722-32. Epub 2019/10/09. doi: 10.1002/bjs5.50190. PubMed PMID: 31592517;

567 PubMed Central PMCID: PMC6773655.

568 25. Najafizada SAM. Policy research institutions and the health SDGs: building momentum

569 in South Asia-country report, Afghanistan. 2017.

570 26. NPHF. Policy Research Institutions and the Health SDGs: Building Momentum in Nepal -

571 Country Report. Kathmandu, Nepal: Nepal Public Health Foundation (NPHF), 2017.

572

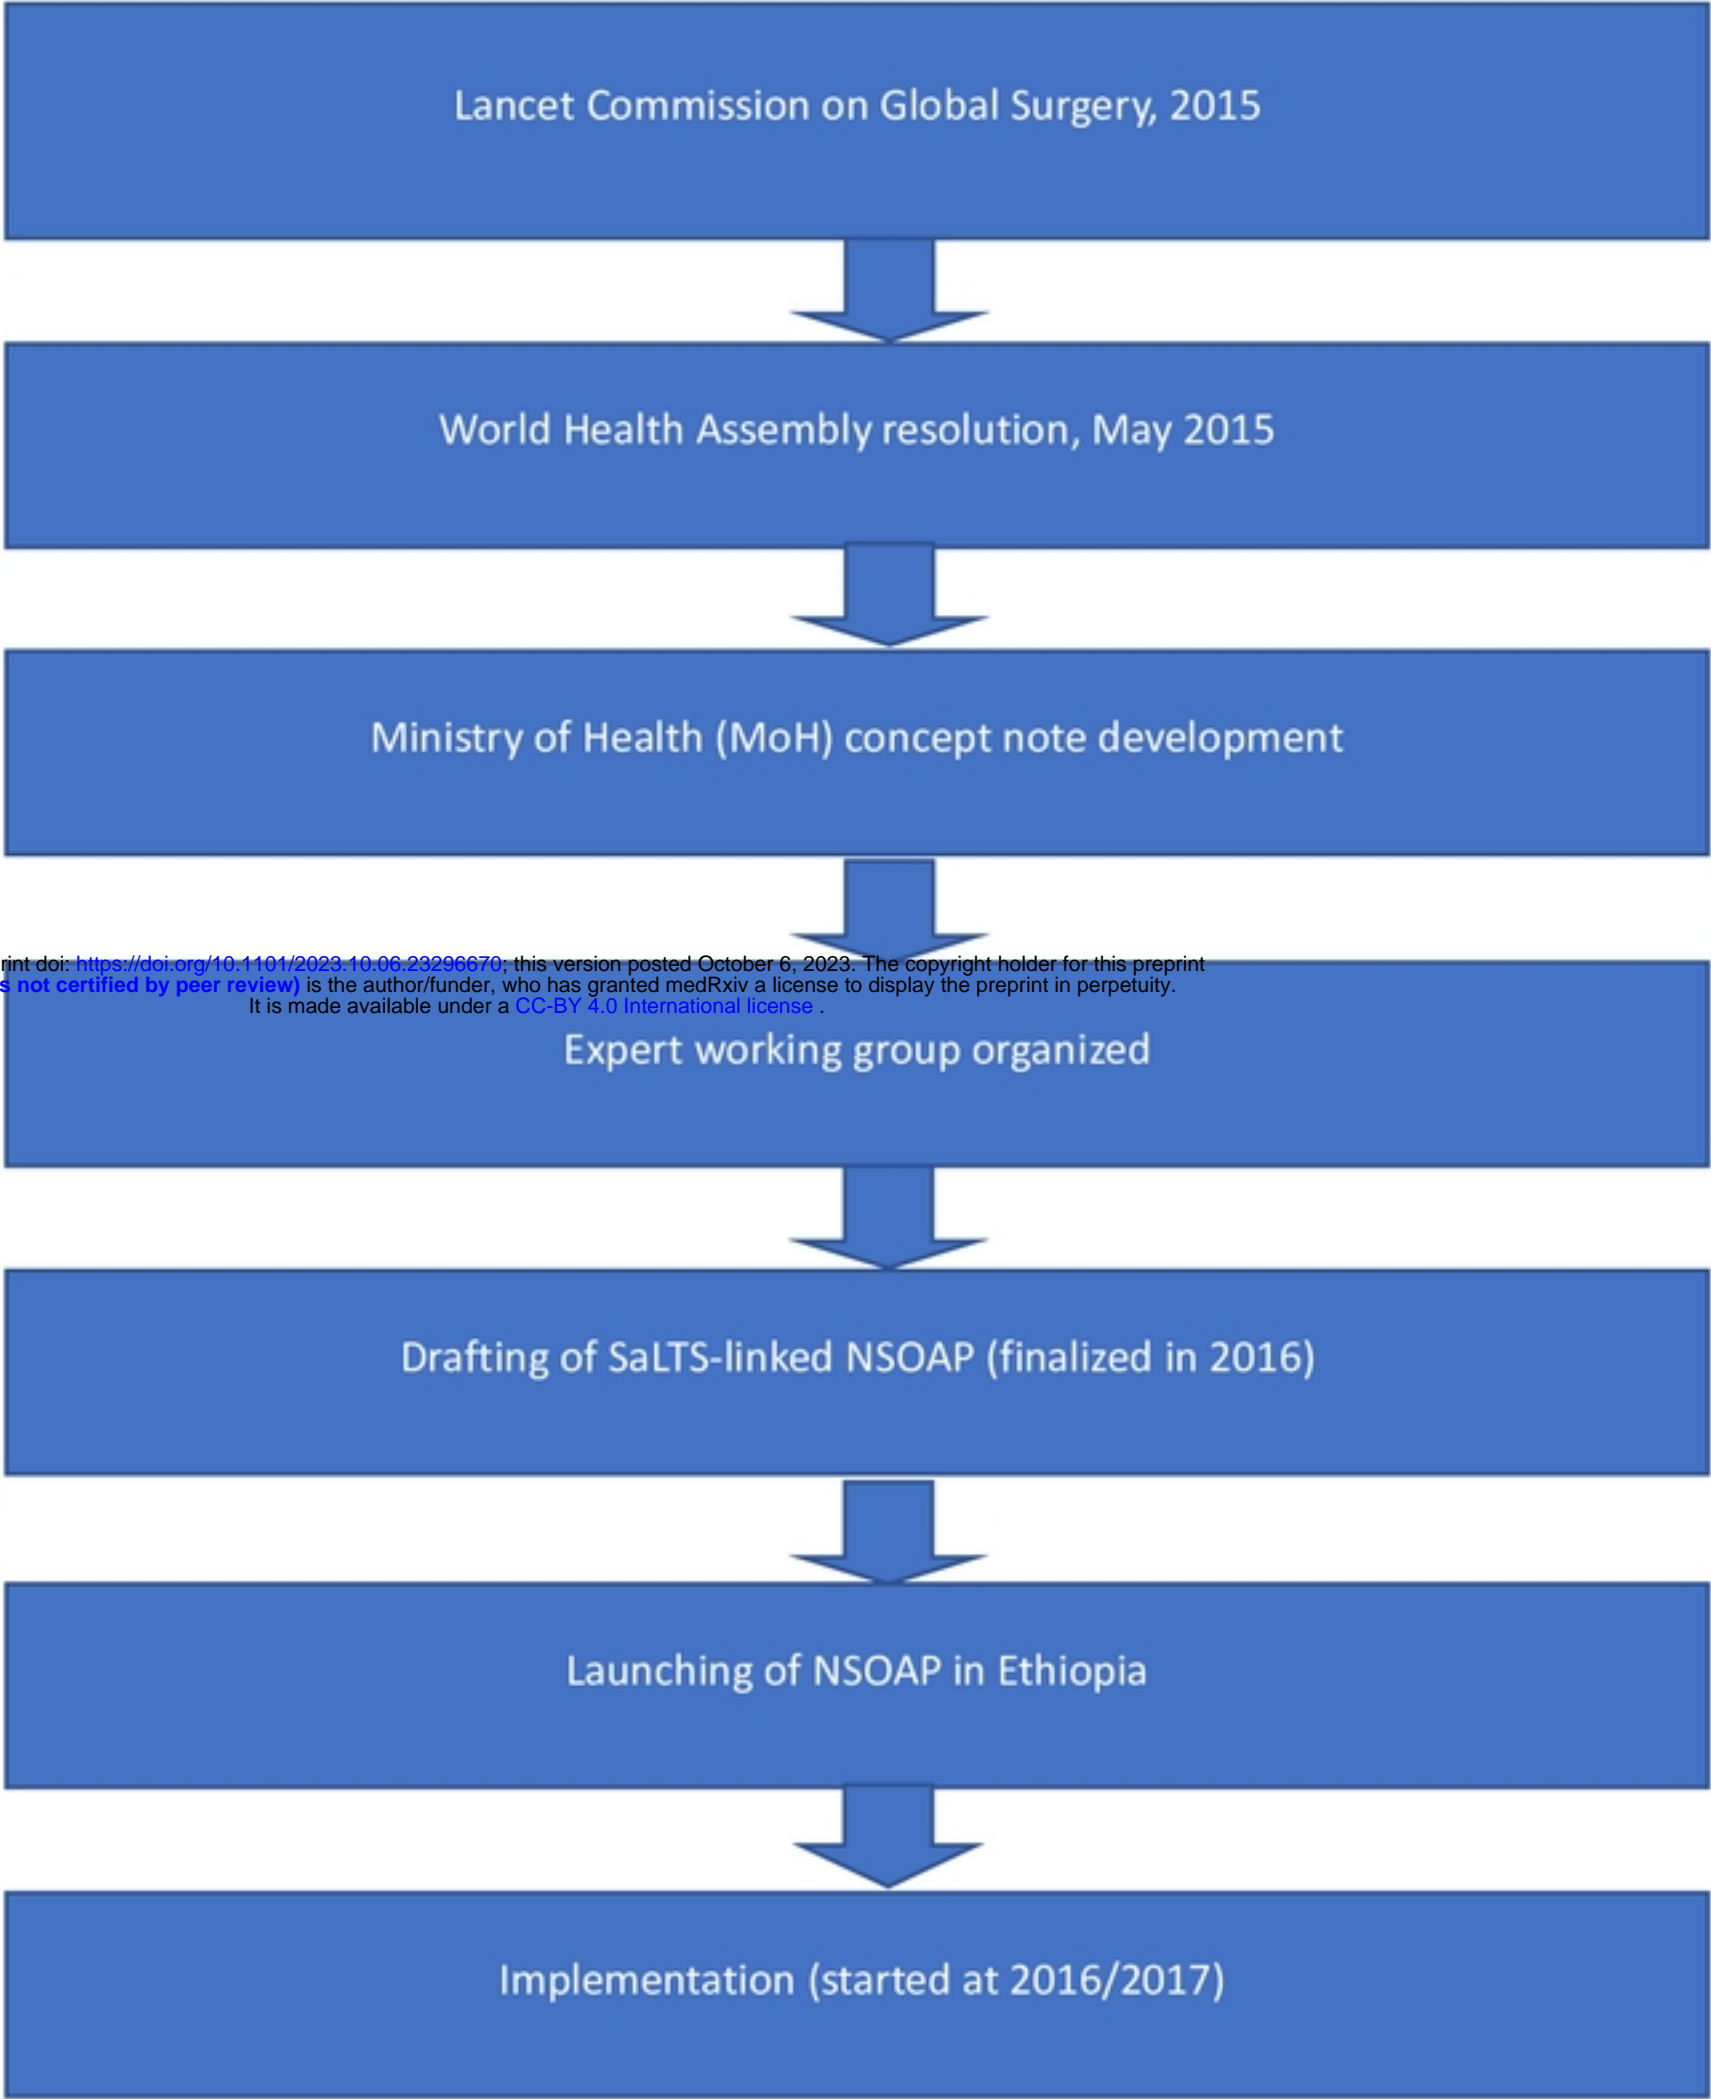

medRxiv preprint doi: <https://doi.org/10.1101/2023.10.06.23296670>; this version posted October 6, 2023. The copyright holder for this preprint (which was not certified by peer review) is the author/funder, who has granted medRxiv a license to display the preprint in perpetuity. It is made available under a [CC-BY 4.0 International license](https://creativecommons.org/licenses/by/4.0/).

Figure
